# Supplementary material for: Mitophagy in yeast is independent of mitochondrial fission and requires the stress response gene WHI2
Source: Oxford University Press journal article supplement (doi:10.1242/jcs.076406), 2011-03-23
Supplement: jcs076406tables1.pdf [file jcs076406tables1.pdf]

**Table S1. Yeast strains used in this study**

| <b>Name</b> | <b>Genotype</b>                                                                    | <b>Source</b>    |
|-------------|------------------------------------------------------------------------------------|------------------|
| NM201       | w303 Mata <i>ade2-1; his3-11,15; leu2,112; trp1; ura23-53; can1-100</i>            |                  |
| NM205       | w303 Mata <i>pho8::HIS3</i> [pHS12 mtDsRed.T3] [pYX242mtPho8]                      | This study       |
| NM211       | BY4742 Mata <i>his3Δ1 ; leu2Δ0 ; lys2Δ0 ; Ura3Δ0</i>                               |                  |
| NM214       | BY4742 Mata [pRS316 GFP-Atg8] [pRS323 mtDsRed.T4]                                  | This study       |
| NM215       | w303 Mata <i>mgm1-5 G408D</i>                                                      | Wong et al. 2000 |
| NM218       | w303 Mata <i>mgm1-5 pho8::HIS3</i> [pHS12 mtdSRed.T3] [pVT100U mtPho8]             | This study       |
| NM225       | BY4742 Mata <i>pho8::kanMX4</i> [pRS323 mtDsRed.T4] [pRS316 GFP-Atg8]              | This study       |
| NM021       | BY4742 Mata <i>pho8::kanMX4</i> [pVT100U mtGFP] [pYX242 mtPho8]                    | This study       |
| NM022       | BY4742 Mata <i>pho8::kanMX4</i> [pVT100U mtGFP] [pYX242 cytPho8]                   | This study       |
| NM 6-1      | BY4742 Mata <i>pho8::kanMX4</i> [Yep213] [pVT100U mtPho8]                          | This study       |
| NM380       | BY4742 Mata <i>pho8::kanMX4</i> [Yep213] [pVT100U cytPho8]                         | This study       |
| NM 6        | BY4742 Mata <i>pho8::kanMX4</i> [Yep213 Dnm1a] [pVT100U mtPho8]                    | This study       |
| NM378       | BY4742 Mata <i>pho8::kanMX4</i> [Yep213 Dnm1a] [pVT100U cytPho8]                   | This study       |
| NM233       | BY4742 Mata <i>pho8::kanMX4</i> [Yep213 Dnm1 K41A] [pVT100U mtPho8]                | This study       |
| NM379       | BY4742 Mata <i>pho8::kanMX4</i> [Yep213 Dnm1 K41A] [pVT100U cytPho8]               | This study       |
| NM234       | BY4742 Mata <i>pho8::kanMX4</i> [Yep213 Dnm1 S42N] [pVT100U mtPho8]                | This study       |
| NM235       | BY4742 Mata <i>pho8::kanMX4</i> [Yep213 Dnm1 S42N] [pVT100U cytPho8]               | This study       |
| NM246       | BY4742 Mata <i>dnm1::kanMX4</i> [pRS316 GFP-Atg8] [pRS323 mtDsRed.T4]              | This study       |
| NM070       | BY4742 Mata <i>dnm1::kanMX4 pho8::HIS3</i> [pVT100U mtGFP] [pYX242 mtPho8]         | This study       |
| NM071       | BY4742 Mata <i>dnm1::kanMX4 pho8::HIS3</i> [pVT100U mtGFP] [pYX242 cytPho8]        | This study       |
| NM261       | BY4742 Mata <i>fis1::kanMX4 whi2-1</i> [pRS316 GFP-Atg8] [pRS323 mtDsRed.T4]       | This study       |
| R-771       | BY4742 Mata <i>fis1::kanMX4 whi2-2</i> [pRS323 mtDsRed.T4] [pRS416]                | This study       |
| R-772       | BY4742 Mata <i>fis1::kanMX4 whi2-2</i> [pRS323 mtDsRed.T4] [pRS416 Fis1]           | This study       |
| R-773       | BY4742 Mata <i>fis1::kanMX4 whi2-2</i> [pRS323 mtDsRed.T4] [YPlac33 Whi2]          | This study       |
| NM044       | BY4742 Mata <i>fis1::kanMX4 whi2-1 pho8::HIS3</i> [pVT100U mtGFP] [pYX242 mtPho8]  | This study       |
| NM043       | BY4742 Mata <i>fis1::kanMX4 whi2-1 pho8::HIS3</i> [pVT100U mtGFP] [pYX242 cytPho8] | This study       |
| NM091       | BY4742 Mata <i>fis1::kanMX4 whi2-1 pho8::HIS3</i> [pRS416 Fis1] [pYX242 mtPho8]    | This study       |
| NM092       | BY4742 Mata <i>fis1::kanMX4 whi2-1 pho8::HIS3</i> [pRS416 Fis1] [pYX242 cytPho8]   | This study       |
| NM095       | BY4742 Mata <i>fis1::kanMX4 whi2-1 pho8::HIS3</i> [pRS416] [pYX242 mtPho8]         | This study       |
| NM096       | BY4742 Mata <i>fis1::kanMX4 whi2-1 pho8::HIS3</i> [pRS416] [pYX242 cytPho8]        | This study       |
| NM093       | BY4742 Mata <i>fis1::kanMX4 whi2-1 pho8::HIS3</i> [YPlac33 Whi2] [pYX242 mtPho8]   | This study       |
| NM094       | BY4742 Mata <i>fis1::kanMX4 whi2-1 pho8::HIS3</i> [YPlac33 Whi2] [pYX242 cytPho8]  | This study       |
| NM297       | BY4742 Mata <i>atg8::kanMX4 pho8::HIS3</i> [pVT100U mtGFP] [pYX242 mtPho8]         | This study       |
| NM298       | BY4742 Mata <i>atg8::kanMX4 pho8::HIS3</i> [pVT100U mtGFP] [pYX242 cytPho8]        | This study       |
| NM327       | BY4742 Mata <i>mdv1::kanMX4</i> [pRS316 GFP-Atg8] [pRS323 mtDsRed.T4]              | This study       |
| NM03        | BY4742 Mata <i>mdv1::kanMX4 pho8::HIS3</i> [pVT100U mtGFP] [pYX242 mtPho8]         | This study       |
| NM04        | BY4742 Mata <i>mdv1::kanMX4 pho8::HIS3</i> [pVT100U mtGFP] [pYX242 cytPho8]        | This study       |
| NM375       | BY4742 Mata <i>caf4::kanMX4</i> [pRS316 GFP-Atg8] [pRS323 mtDsRed.T4]              | This study       |
| NM050       | BY4742 Mata <i>caf4::kanMX4 pho8::HIS3</i> [pVT100U mtGFP] [pYX242 mtPho8]         | This study       |
| NM333       | BY4742 Mata <i>caf4::kanMX4 pho8::HIS3</i> [pVT100U mtGFP] [pYX242 cytPho8]        | This study       |
| NM344       | BY4742 Mata <i>atg11::kanMX4</i> [pRS316 GFP-Atg8] [pRS323 mtDsRed.T4]             | This study       |
| NM346       | BY4742 Mata <i>atg11::kanMX4 pho8::HIS3</i> [pVT100U mtGFP] [pYX242mtPho8]         | This study       |
| NM347       | BY4742 Mata <i>atg11::kanMX4 pho8::HIS3</i> [pVT100U mtGFP] [pYX242 cytPho8]       | This study       |
| NM350       | BY4742 Mata <i>atg20::kanMX4 pho8::HIS3</i> [pVT100U mtGFP] [pYX242 mtPho8]        | This study       |
| NM351       | BY4742 Mata <i>atg20::kanMX4 pho8::HIS3</i> [pVT100U mtGFP] [pYX242 cytPho8]       | This study       |
| NM354       | BY4742 Mata <i>atg24::kanMX4 pho8::HIS3</i> [pVT100U mtGFP] [pYX242 mtPho8]        | This study       |
| NM355       | BY4742 Mata <i>atg24::kanMX4 pho8::HIS3</i> [pVT100U mtGFP] [pYX242 cytPho8]       | This study       |
| NM023       | BY4742 Mata <i>pep4::kanMX4 pho8::HIS3</i> [pVT100U mtGFP] [pYX242 mtPho8]         | This study       |
| NM024       | BY4742 Mata <i>pep4::kanMX4 pho8::HIS3</i> [pVT100U mtGFP] [pYX242 cytPho8]        | This study       |
| NM365       | BY4742 Mata <i>whi2::kanMX4</i> [pRS316 GFP-Atg8] [pRS323 mtdSRed.T4]              | This study       |
| NM041       | BY4742 Mata <i>whi2::kanMX4 pho8::HIS3</i> [pVT100U mtGFP] [pYX242 mtPho8]         | This study       |
| NM042       | BY4742 Mata <i>whi2::kanMX4 pho8::HIS3</i> [pVT100U mtGFP] [pYX242 cytPho8]        | This study       |
| NM064       | BY4742 Mata <i>whi2::kanMX4 pho8::HIS3</i> [YPlac33 Whi2] [pYX242 mtPho8]          | This study       |
| NM065       | BY4742 Mata <i>whi2::kanMX4 pho8::HIS3</i> [YPlac33 Whi2] [pYX242 cytPho8]         | This study       |
| NM101       | BY4742 Mata <i>whi2::kanMX4 pho8::HIS3</i> [pRS416] [pYX242 mtPho8]                | This study       |
| NM102       | BY4742 Mata <i>whi2::kanMX4 pho8::HIS3</i> [pRS416] [pYX242 cytPho8]               | This study       |
| R-952       | BY4742 Mata <i>fis1::kanMX4 whi2-2</i> [pRS323 mtDsRed.T4] [pRS416]                | This study       |
| R-954       | BY4742 Mata <i>fis1::kanMX4 whi2-2</i> [pRS323 mtDsRed.T4] [YPlac33 Whi2]          | This study       |
| NM409       | W303 Mata <i>fis1::KanMX4 pho8::HIS3</i> [pVT100U mtGFP] [pYX242 mtPho8]           | This study       |
| NM407       | W303 Mata <i>fis1::KanMX4 pho8::HIS3</i> [pVT100U mtGFP] [pYX242 cytPho8]          | This study       |
| R-1192      | W303 Mata <i>fis1::KanMX4 pho8::HIS3</i> [pRS316 GFP-Atg8] [pHS12 mtDsRed.T3]      | This study       |

|        |                                                                              |            |
|--------|------------------------------------------------------------------------------|------------|
| R-1288 | BY4742 Mat $\alpha$ <i>whi2::kanMX4</i> [pRS313 GFP-Atg8] [pVT100U]          | This study |
| R-1287 | BY4742 Mat $\alpha$ <i>whi2::kanMX4</i> [pRS313 GFP-Atg8] [pVT100U Whi2-His] | This study |
| R-1276 | BY4742 Mat $\alpha$ [pYX242]                                                 | This study |
| R-1277 | BY4742 Mat $\alpha$ <i>pho8::kanMX4</i> [pYX242]                             | This study |
| R-1278 | BY4742 Mat $\alpha$ <i>pho8::kanMX4</i> [pYX242 mtPho8]                      | This study |
| R-1279 | BY4742 Mat $\alpha$ <i>pho8::kanMX4</i> [pYX242 <i>cytPho8</i> ]             | This study |
| NM453  | BY4742 Mat $\alpha$ [pVT100U mtGFP]                                          | This study |
