# Supplementary material for: Mitophagy in yeast is independent of mitochondrial fission and requires the stress response gene WHI2
Source: Oxford University Press journal article supplement (doi:10.1242/jcs.076406), 2011-03-23
Supplement: jcs076406tables2.pdf [file jcs076406tables2.pdf]

**Table S2: Plasmids used in this study**

| <b>Name</b>       | <b>Characteristics</b>                            | <b>Source</b>                  |
|-------------------|---------------------------------------------------|--------------------------------|
| pVT100U           | 2 $\mu$ ADH URA3                                  | (Vernet et al., 1987)          |
| pVT100U mtALP     | 2 $\mu$ , ADH, URA3                               | This study                     |
| pVT100U cytALP    | 2 $\mu$ , ADH, URA3                               | This study                     |
| pVT100U mtGFP     | 2 $\mu$ , ADH, URA3                               | (Westermann and Neupert, 2000) |
| pYX242            | 2 $\mu$ , TPI, LEU2                               | Novagen                        |
| pYX242 mtALP      | 2 $\mu$ , TPI, LEU2                               | This study                     |
| pYX242 cytALP     | 2 $\mu$ , TPI, LEU2                               | This study                     |
| Yep213            | 2 $\mu$ , LEU2                                    | (Otsuga et al., 1998)          |
| Yep213 Dnm1a      | 2 $\mu$ , LEU2                                    | (Otsuga et al., 1998)          |
| Yep213 Dnm1 K41A  | 2 $\mu$ , LEU2                                    | (Otsuga et al., 1998)          |
| Yep213 Dnm1 S42N  | 2 $\mu$ , LEU2                                    | (Otsuga et al., 1998)          |
| pHS12 mtDsRed.T3  | CEN, ADH, LEU2                                    | (Bevis and Glick, 2002)        |
| pRS316            | CEN, URA3                                         | (Sikorski and Hieter, 1989)    |
| pRS316 GFP-Atg8   | CEN, URA3                                         | This study                     |
| pRS313 GFP-Atg8   | CEN, HIS3                                         | This study                     |
| pRS323 mtDsRed.T4 | 2 $\mu$ , TPI HIS3                                | (Jakobs et al., 2003)          |
| pRS416 Fis1       | CEN, URA3 515 bp 5'-UTR & 238 bp 3'-UTR from FIS1 | This study                     |
| YPlac33 WHI2      | CEN, URA3, 5'-UTR WHI2                            | (Cheng et al., 2008)           |
| pVT100U WHI2-His  | 2 $\mu$ ADH URA3                                  | This study                     |
