# Supplementary figures and images for: Mitophagy in yeast is independent of mitochondrial fission and requires the stress response gene WHI2
Source: Oxford University Press journal article supplement (doi:10.1242/jcs.076406), 2011-03-23

**A**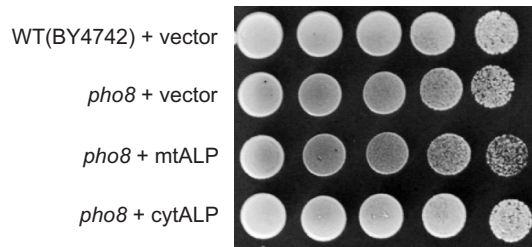**B**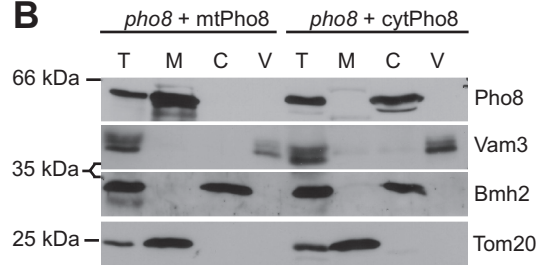**C**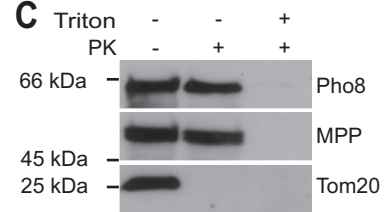**D**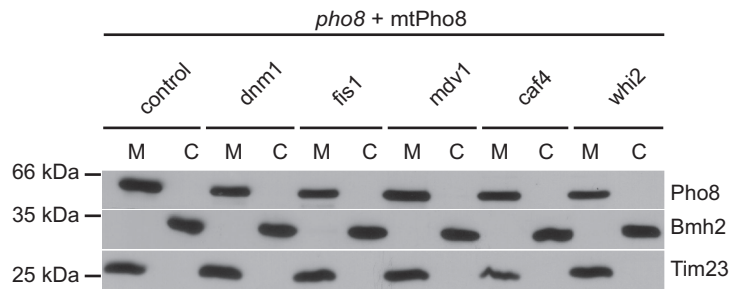

Supplement: jcs076406figs1.pdf [file jcs076406figs1.pdf]

**A**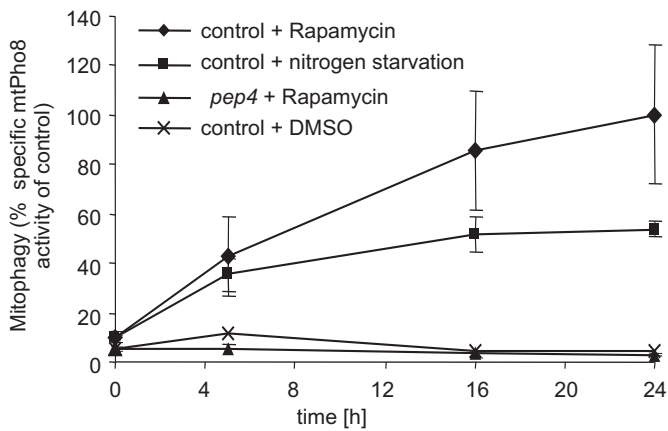**B**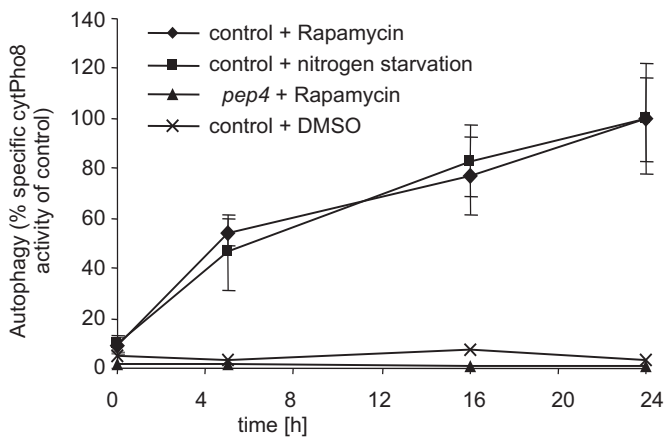

Supplement: jcs076406figs2.pdf [file jcs076406figs2.pdf]

wild type

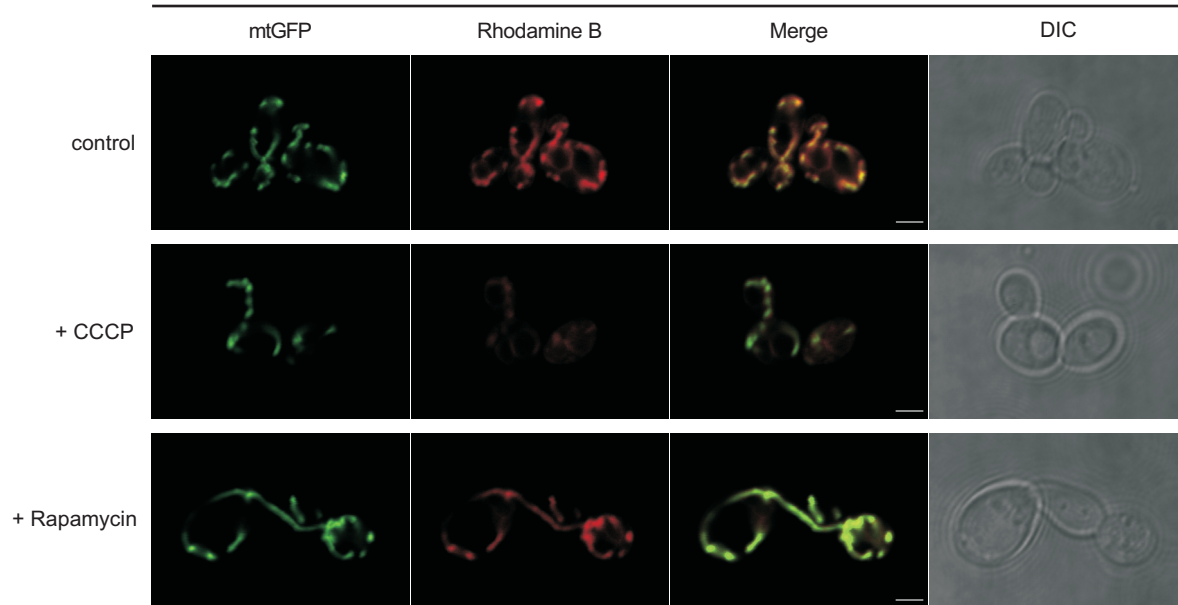

Supplement: jcs076406figs3.pdf [file jcs076406figs3.pdf]

**A**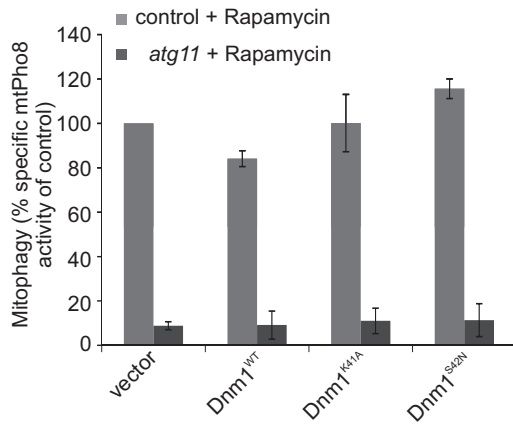**B**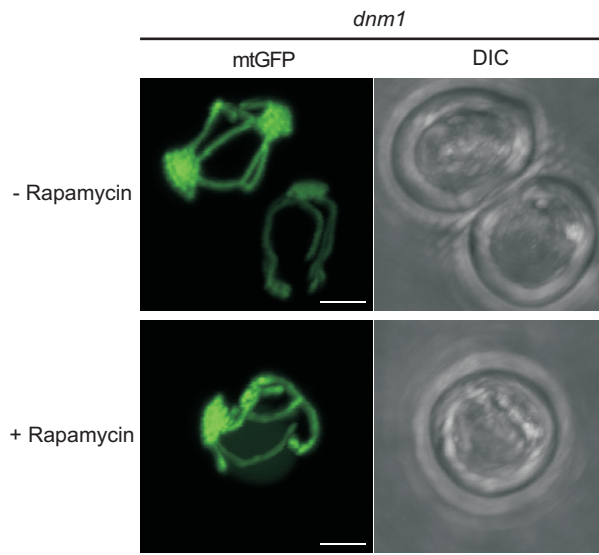**C**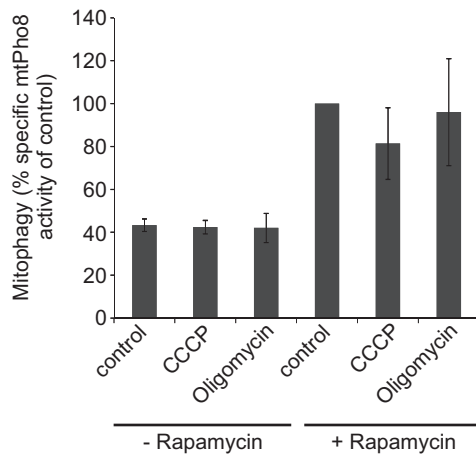**D**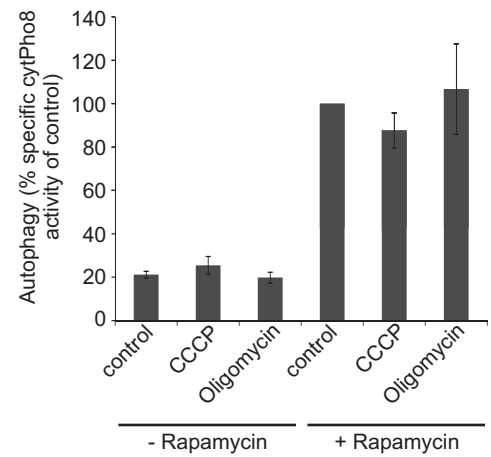

Supplement: jcs076406figs4.pdf [file jcs076406figs4.pdf]

**A**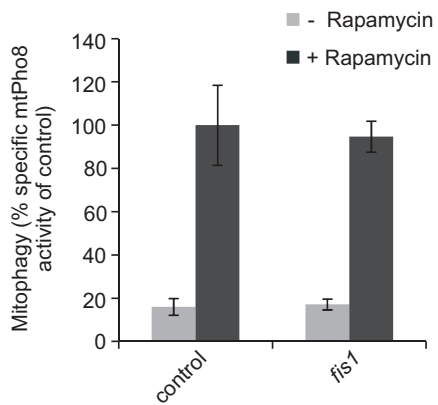**B**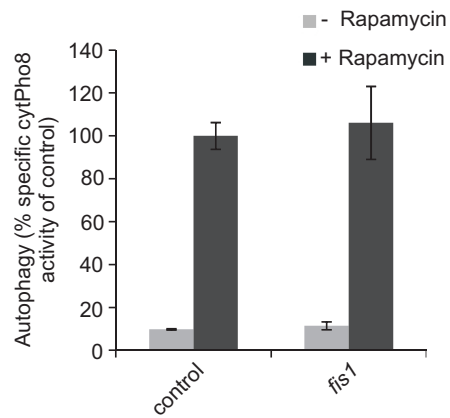**C**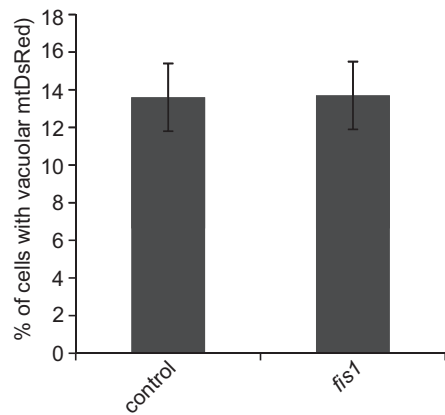

Supplement: jcs076406figs5.pdf [file jcs076406figs5.pdf]
